# Supplementary material for: Flavonoids from Rosa davurica Pall. fruits prevent high-fat diet-induced obesity and liver injury via modulation of the gut microbiota in mice
Source: Royal Society of Chemistry journal article supplement (doi:10.1039/d1fo01373d), 2021-01-01
Supplement: d1fo01373d1.pdf [file d1fo01373d1.pdf]

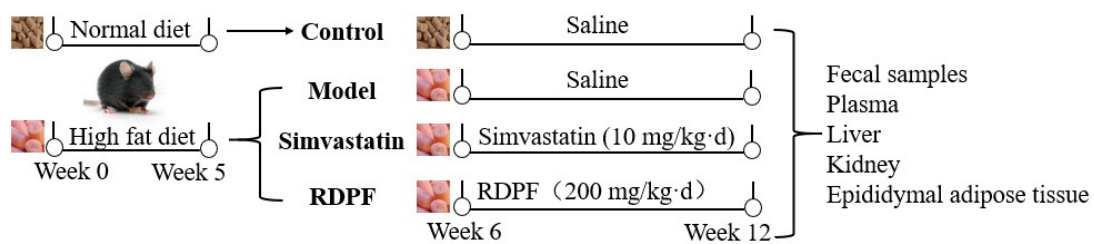

Fig S1. Establishment of HFD-induced obese mice model and RDPF treatment.

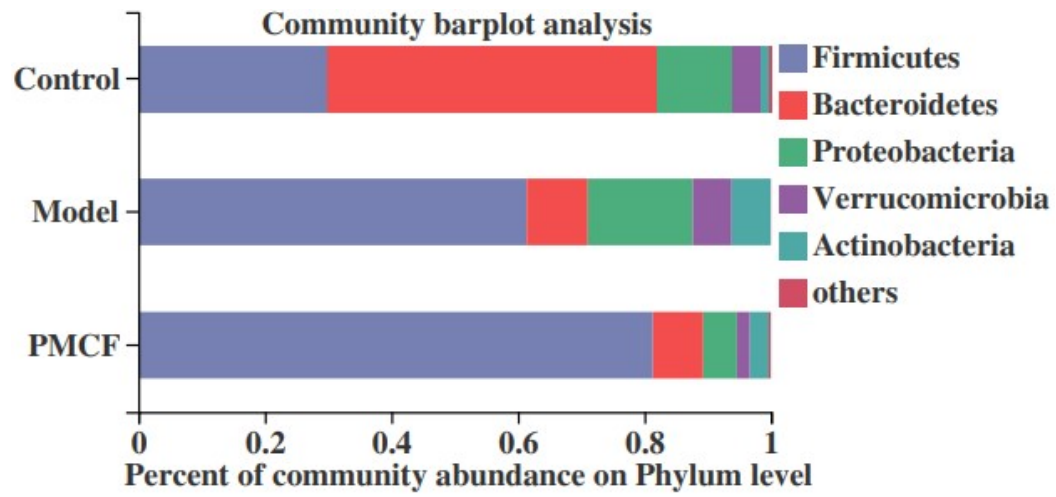

Fig S2. Effects of PMCF on percent of community abundance on phylum level.
